# Supplementary material for: Effects of High-Pressure Homogenization on the Structural, Physical, and Rheological Properties of Lily Pulp
Source: MDPI journal article supplement (doi:10.3390/foods8100472), 2019-10-10
Supplement: s1 [file s1]

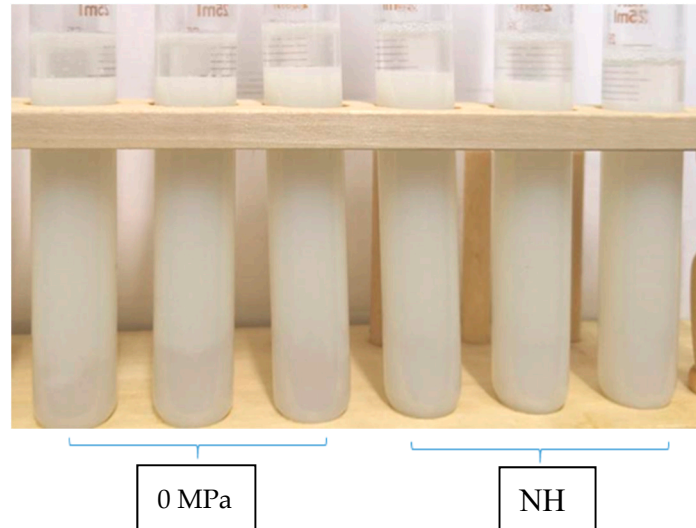

**Figure S1** Macroscopic observations of NH (non-homogenized) sample and 0 MPa processed samples after 1 d at 25 °C.

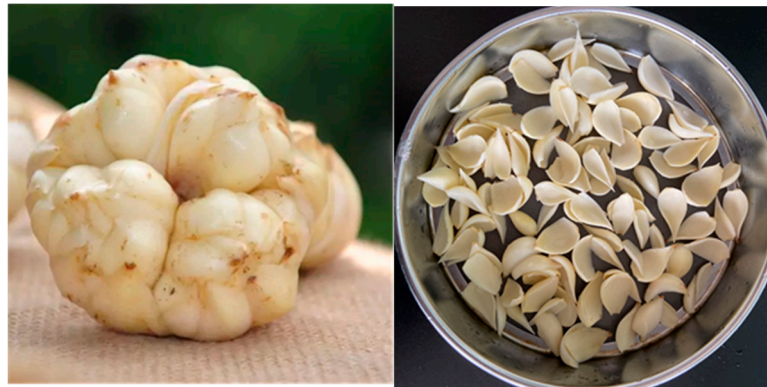

**Figure S2.** A photo of fresh lily bulbs.
